# Supplementary material for: A real-world pharmacovigilance analysis of adverse events associated with irbesartan using the FAERS and JADER databases
Source: Front Pharmacol. 2024 Nov 20;15:1485190. doi: 10.3389/fphar.2024.1485190 (PMC11614654; doi:10.3389/fphar.2024.1485190)
Supplement: Supplementary file 6 [file Table1.xlsx]

## Sheet: Sheet1
PT	System Organ Class	Preferred term	Case number	ROR(95%CI)	PRR	EBGM	EBGM05	EBGM(EBGM05)	IC2	IC025	IC(IC025)	pvalue	adjustedP
ACUTE KIDNEY INJURY	Renal And Urinary Disorders	Acute Kidney Injury	586	10.31(9.49-11.19)	10.01(4751.56)	9.98	9.31	9.98(9.31)	3.32	1.65	3.32(1.65)	0	0
HYPONATRAEMIA*	Metabolism And Nutrition Disorders	Hyponatraemia*	343	20.68(18.58-23.02)	20.31(6259.57)	20.18	18.45	20.18(18.45)	4.33	2.67	4.33(2.67)	0	0
HYPOTENSION	Vascular Disorders	Hypotension	326	5.51(4.94-6.15)	5.43(1181.26)	5.43	4.95	5.43(4.95)	2.44	0.77	2.44(0.77)	6.64e-258	1.71e-255
BLOOD PRESSURE INCREASED	Investigations	Blood Pressure Increased	237	5.11(4.49-5.81)	5.06(771.64)	5.05	4.53	5.05(4.53)	2.34	0.67	2.34(0.67)	6.02e-169	1.55e-166
HYPERKALAEMIA	Metabolism And Nutrition Disorders	Hyperkalaemia	234	23.16(20.35-26.36)	22.88(4860.42)	22.71	20.38	22.71(20.38)	4.51	2.84	4.51(2.84)	0	0
DRUG INTERACTION	General Disorders And Administration Site Conditions	Drug Interaction	169	3.56(3.06-4.14)	3.54(308.15)	3.54	3.11	3.54(3.11)	1.82	0.16	1.82(0.16)	1.97e-68	5.06e-66
SYNCOPE*	Nervous System Disorders	Syncope*	151	4.96(4.23-5.82)	4.93(472.73)	4.92	4.3	4.92(4.3)	2.3	0.63	2.3(0.63)	5.83e-104	1.5e-101
BRADYCARDIA	Cardiac Disorders	Bradycardia	127	7.83(6.57-9.32)	7.78(749.07)	7.76	6.71	7.76(6.71)	2.96	1.29	2.96(1.29)	1.88e-163	4.84e-161
ANGIOEDEMA	Skin And Subcutaneous Tissue Disorders	Angioedema	91	6.61(5.38-8.12)	6.58(429.87)	6.57	5.53	6.57(5.53)	2.72	1.05	2.72(1.05)	2.81e-94	7.21e-92
ORTHOSTATIC HYPOTENSION	Vascular Disorders	Orthostatic Hypotension	74	14.04(11.17-17.65)	13.99(888.51)	13.93	11.5	13.93(11.5)	3.8	2.13	3.8(2.13)	1.96e-192	5.03e-190
HYPOKALAEMIA*	Metabolism And Nutrition Disorders	Hypokalaemia*	68	5.02(3.95-6.37)	5(217.66)	5	4.09	5(4.09)	2.32	0.66	2.32(0.66)	2.17e-48	5.58e-46
LACTIC ACIDOSIS*	Metabolism And Nutrition Disorders	Lactic Acidosis*	61	6.86(5.33-8.82)	6.84(303.62)	6.83	5.53	6.83(5.53)	2.77	1.11	2.77(1.11)	9.87e-67	2.54e-64
PANCREATITIS ACUTE*	Gastrointestinal Disorders	Pancreatitis Acute*	50	7.76(5.88-10.25)	7.74(292.88)	7.72	6.12	7.72(6.12)	2.95	1.28	2.95(1.28)	3.37e-64	8.65e-62
ARRHYTHMIA*	Cardiac Disorders	Arrhythmia*	50	3.45(2.62-4.56)	3.45(86.84)	3.44	2.73	3.44(2.73)	1.78	0.12	1.78(0.12)	4.03e-20	1.04e-17
RHABDOMYOLYSIS*	Musculoskeletal And Connective Tissue Disorders	Rhabdomyolysis*	49	3.99(3.01-5.28)	3.98(109.35)	3.98	3.15	3.98(3.15)	1.99	0.33	1.99(0.33)	6.07e-25	1.56e-22
HYPOGLYCAEMIA	Metabolism And Nutrition Disorders	Hypoglycaemia	47	3.19(2.4-4.25)	3.19(70.51)	3.18	2.51	3.18(2.51)	1.67	0	1.67(0)	1.38e-16	3.54e-14
BLOOD CREATINE PHOSPHOKINASE INCREASED	Investigations	Blood Creatine Phosphokinase Increased	45	4.88(3.64-6.54)	4.87(138.39)	4.87	3.81	4.87(3.81)	2.28	0.62	2.28(0.62)	4.14e-31	1.06e-28
CHOLESTASIS*	Hepatobiliary Disorders	Cholestasis*	45	8.12(6.06-10.88)	8.1(279.34)	8.08	6.32	8.08(6.32)	3.01	1.35	3.01(1.35)	3.57e-61	9.17e-59
BLOOD PRESSURE INADEQUATELY CONTROLLED*	Vascular Disorders	Blood Pressure Inadequately Controlled*	34	17.49(12.48-24.51)	17.46(524.56)	17.36	13.09	17.36(13.09)	4.12	2.45	4.12(2.45)	1.48e-112	3.79e-110
PRESYNCOPE*	Nervous System Disorders	Presyncope*	34	4.79(3.42-6.71)	4.78(101.6)	4.78	3.6	4.78(3.6)	2.26	0.59	2.26(0.59)	4.49e-23	1.15e-20
SWOLLEN TONGUE	Gastrointestinal Disorders	Swollen Tongue	34	3.6(2.57-5.04)	3.6(63.71)	3.59	2.71	3.59(2.71)	1.85	0.18	1.85(0.18)	5.31e-15	1.37e-12
APHASIA*	Nervous System Disorders	Aphasia*	34	3.63(2.59-5.08)	3.62(64.57)	3.62	2.73	3.62(2.73)	1.86	0.19	1.86(0.19)	3.48e-15	8.94e-13
AGRANULOCYTOSIS*	Blood And Lymphatic System Disorders	Agranulocytosis*	34	6.55(4.68-9.18)	6.54(159.33)	6.53	4.93	6.53(4.93)	2.71	1.04	2.71(1.04)	2.5e-35	6.43e-33
METABOLIC ACIDOSIS*	Metabolism And Nutrition Disorders	Metabolic Acidosis*	34	3.73(2.66-5.23)	3.73(67.77)	3.72	2.81	3.72(2.81)	1.9	0.23	1.9(0.23)	7.22e-16	1.86e-13
LIP SWELLING	Gastrointestinal Disorders	Lip Swelling	32	3.25(2.29-4.59)	3.24(49.59)	3.24	2.42	3.24(2.42)	1.7	0.03	1.7(0.03)	5.86e-12	1.51e-09
MUSCLE SPASTICITY*	Nervous System Disorders	Muscle Spasticity*	32	8.03(5.68-11.37)	8.02(196.19)	8	5.98	8(5.98)	3	1.33	3(1.33)	4.65e-43	1.19e-40
URINARY RETENTION*	Renal And Urinary Disorders	Urinary Retention*	32	3.24(2.29-4.58)	3.23(49.32)	3.23	2.42	3.23(2.42)	1.69	0.03	1.69(0.03)	6.71e-12	1.73e-09
INAPPROPRIATE ANTIDIURETIC HORMONE SECRETION*	Endocrine Disorders	Inappropriate Antidiuretic Hormone Secretion*	30	10.31(7.2-14.76)	10.29(250.89)	10.26	7.6	10.26(7.6)	3.36	1.69	3.36(1.69)	1.67e-54	4.29e-52
BLOOD PRESSURE FLUCTUATION*	Vascular Disorders	Blood Pressure Fluctuation*	30	3.91(2.73-5.59)	3.9(64.77)	3.9	2.89	3.9(2.89)	1.96	0.3	1.96(0.3)	3.62e-15	9.3e-13
EOSINOPHILIA*	Blood And Lymphatic System Disorders	Eosinophilia*	29	5.72(3.98-8.24)	5.72(112.68)	5.71	4.21	5.71(4.21)	2.51	0.85	2.51(0.85)	2.67e-25	6.86e-23
HEPATOCELLULAR INJURY*	Hepatobiliary Disorders	Hepatocellular Injury*	29	5.49(3.81-7.91)	5.48(106.14)	5.48	4.04	5.48(4.04)	2.45	0.79	2.45(0.79)	6.43e-24	1.65e-21
HEMIPLEGIA*	Nervous System Disorders	Hemiplegia*	29	11.29(7.84-16.26)	11.28(270.54)	11.24	8.28	11.24(8.28)	3.49	1.82	3.49(1.82)	1.41e-58	3.62e-56
SENSORY LOSS*	Nervous System Disorders	Sensory Loss*	28	11.44(7.89-16.59)	11.43(265.45)	11.39	8.35	11.39(8.35)	3.51	1.84	3.51(1.84)	1.95e-57	5.01e-55
EATING DISORDER*	Psychiatric Disorders	Eating Disorder*	27	4.12(2.83-6.01)	4.12(63.66)	4.11	3	4.11(3)	2.04	0.37	2.04(0.37)	7.07e-15	1.82e-12
COORDINATION ABNORMAL*	Nervous System Disorders	Coordination Abnormal*	26	5.89(4.01-8.65)	5.88(105.11)	5.87	4.25	5.87(4.25)	2.55	0.89	2.55(0.89)	1.31e-23	3.37e-21
SINUS BRADYCARDIA	Cardiac Disorders	Sinus Bradycardia	26	8.93(6.08-13.13)	8.92(182.29)	8.9	6.44	8.9(6.44)	3.15	1.49	3.15(1.49)	7.79e-40	2e-37
RASH MACULO-PAPULAR*	Skin And Subcutaneous Tissue Disorders	Rash Maculo-Papular*	25	3.9(2.64-5.78)	3.9(53.84)	3.9	2.8	3.9(2.8)	1.96	0.3	1.96(0.3)	9.31e-13	2.39e-10
BLOOD SODIUM DECREASED*	Investigations	Blood Sodium Decreased*	25	4.43(2.99-6.56)	4.43(66.28)	4.42	3.18	4.42(3.18)	2.15	0.48	2.15(0.48)	2.18e-15	5.6e-13
TOXIC SKIN ERUPTION*	Skin And Subcutaneous Tissue Disorders	Toxic Skin Eruption*	25	8.37(5.65-12.39)	8.36(161.47)	8.34	6	8.34(6)	3.06	1.39	3.06(1.39)	2.08e-35	5.35e-33
AFFECT LABILITY*	Psychiatric Disorders	Affect Lability*	25	8.37(5.65-12.4)	8.36(161.54)	8.34	6	8.34(6)	3.06	1.39	3.06(1.39)	2.01e-35	5.17e-33
ISCHAEMIC STROKE*	Nervous System Disorders	Ischaemic Stroke*	24	4.44(2.97-6.63)	4.44(63.78)	4.43	3.17	4.43(3.17)	2.15	0.48	2.15(0.48)	7.78e-15	2e-12
HEMIPARESIS*	Nervous System Disorders	Hemiparesis*	24	4.53(3.03-6.76)	4.52(65.77)	4.52	3.23	4.52(3.23)	2.18	0.51	2.18(0.51)	2.95e-15	7.59e-13
PERSONALITY DISORDER*	Psychiatric Disorders	Personality Disorder*	24	30.1(20.13-45.01)	30.06(667.45)	29.77	21.26	29.77(21.26)	4.9	3.23	4.9(3.23)	5.55e-141	1.43e-138
CAROTID ARTERY THROMBOSIS*	Nervous System Disorders	Carotid Artery Thrombosis*	24	108.66(72.27-163.36)	108.52(2464.71)	104.65	74.4	104.65(74.4)	6.71	5.04	6.71(5.04)	0	0
MOTOR DYSFUNCTION*	Nervous System Disorders	Motor Dysfunction*	24	7.98(5.34-11.91)	7.97(145.85)	7.95	5.68	7.95(5.68)	2.99	1.32	2.99(1.32)	4.44e-32	1.14e-29
BLOOD PRESSURE ABNORMAL*	Investigations	Blood Pressure Abnormal*	23	4.03(2.68-6.07)	4.03(52.3)	4.02	2.86	4.02(2.86)	2.01	0.34	2.01(0.34)	2.17e-12	5.58e-10
PEMPHIGOID*	Skin And Subcutaneous Tissue Disorders	Pemphigoid*	23	11.53(7.65-17.37)	11.52(220.01)	11.47	8.14	11.47(8.14)	3.52	1.85	3.52(1.85)	1.64e-47	4.21e-45
ADJUSTMENT DISORDER*	Psychiatric Disorders	Adjustment Disorder*	23	63.52(42.01-96.04)	63.44(1383.42)	62.11	43.95	62.11(43.95)	5.96	4.29	5.96(4.29)	1.16e-289	2.97e-287
CARDIOGENIC SHOCK*	Cardiac Disorders	Cardiogenic Shock*	23	5.76(3.83-8.67)	5.75(90.2)	5.75	4.08	5.75(4.08)	2.52	0.86	2.52(0.86)	2.3e-20	5.92e-18
TUBULOINTERSTITIAL NEPHRITIS*	Renal And Urinary Disorders	Tubulointerstitial Nephritis*	23	3.89(2.59-5.86)	3.89(49.31)	3.89	2.76	3.89(2.76)	1.96	0.29	1.96(0.29)	9.33e-12	2.4e-09
PHOTOSENSITIVITY REACTION*	Skin And Subcutaneous Tissue Disorders	Photosensitivity Reaction*	22	4.41(2.9-6.7)	4.4(57.83)	4.4	3.1	4.4(3.1)	2.14	0.47	2.14(0.47)	1.57e-13	4.04e-11
NEUROLOGIC NEGLECT SYNDROME*	Nervous System Disorders	Neurologic Neglect Syndrome*	22	156.19(101.69-239.91)	156.01(3215.77)	148.11	103.43	148.11(103.43)	7.21	5.54	7.21(5.54)	0	0
ANURIA*	Renal And Urinary Disorders	Anuria*	22	8.21(5.4-12.48)	8.2(138.72)	8.18	5.76	8.18(5.76)	3.03	1.37	3.03(1.37)	1.8e-30	4.63e-28
PRODUCT TASTE ABNORMAL*	Product Issues	Product Taste Abnormal*	21	5.42(3.53-8.32)	5.41(75.45)	5.41	3.78	5.41(3.78)	2.43	0.77	2.43(0.77)	3.38e-17	8.69e-15
CUTANEOUS VASCULITIS*	Skin And Subcutaneous Tissue Disorders	Cutaneous Vasculitis*	20	14.38(9.26-22.31)	14.36(247.41)	14.3	9.9	14.3(9.9)	3.84	2.17	3.84(2.17)	6.92e-53	1.78e-50
HYPOMAGNESAEMIA*	Metabolism And Nutrition Disorders	Hypomagnesaemia*	20	5.01(3.23-7.77)	5.01(64.07)	5	3.46	5(3.46)	2.32	0.66	2.32(0.66)	8.9e-15	2.29e-12
OBESITY*	Metabolism And Nutrition Disorders	Obesity*	20	4.35(2.81-6.75)	4.35(51.49)	4.34	3.01	4.34(3.01)	2.12	0.45	2.12(0.45)	3.86e-12	9.91e-10
VASCULITIS*	Vascular Disorders	Vasculitis*	19	5.47(3.49-8.58)	5.47(69.24)	5.46	3.75	5.46(3.75)	2.45	0.78	2.45(0.78)	8.1e-16	2.08e-13
HEPATIC CYTOLYSIS*	Hepatobiliary Disorders	Hepatic Cytolysis*	18	5.37(3.38-8.53)	5.37(63.83)	5.36	3.64	5.36(3.64)	2.42	0.76	2.42(0.76)	1.19e-14	3.07e-12
ELECTROLYTE IMBALANCE*	Metabolism And Nutrition Disorders	Electrolyte Imbalance*	17	5.13(3.19-8.25)	5.12(56.32)	5.12	3.43	5.12(3.43)	2.35	0.69	2.35(0.69)	4.82e-13	1.24e-10
POISONING DELIBERATE*	Injury, Poisoning And Procedural Complications	Poisoning Deliberate*	16	7(4.28-11.43)	6.99(81.94)	6.98	4.63	6.98(4.63)	2.8	1.14	2.8(1.14)	2.73e-18	7.03e-16
COLITIS MICROSCOPIC*	Gastrointestinal Disorders	Colitis Microscopic*	15	10.91(6.57-18.11)	10.9(134.34)	10.86	7.1	10.86(7.1)	3.44	1.77	3.44(1.77)	6.04e-29	1.55e-26
LIPASE INCREASED*	Investigations	Lipase Increased*	15	6.48(3.91-10.76)	6.48(69.34)	6.47	4.23	6.47(4.23)	2.69	1.03	2.69(1.03)	1.26e-15	3.23e-13
WRONG PATIENT RECEIVED PRODUCT*	Injury, Poisoning And Procedural Complications	Wrong Patient Received Product*	15	9.17(5.52-15.22)	9.16(108.73)	9.14	5.98	9.14(5.98)	3.19	1.53	3.19(1.53)	1.05e-23	2.69e-21
PULMONARY PAIN*	Respiratory, Thoracic And Mediastinal Disorders	Pulmonary Pain*	15	18.41(11.08-30.59)	18.39(245.18)	18.28	11.95	18.28(11.95)	4.19	2.53	4.19(2.53)	1.48e-51	3.8e-49
ATRIOVENTRICULAR BLOCK FIRST DEGREE*	Cardiac Disorders	Atrioventricular Block First Degree*	15	10.85(6.53-18.02)	10.84(133.54)	10.81	7.07	10.81(7.07)	3.43	1.77	3.43(1.77)	8.81e-29	2.26e-26
ECCHYMOSIS*	Skin And Subcutaneous Tissue Disorders	Ecchymosis*	14	6.59(3.9-11.14)	6.59(66.22)	6.58	4.24	6.58(4.24)	2.72	1.05	2.72(1.05)	6.45e-15	1.66e-12
NEPHROTIC SYNDROME*	Renal And Urinary Disorders	Nephrotic Syndrome*	14	6.99(4.14-11.82)	6.99(71.68)	6.97	4.5	6.97(4.5)	2.8	1.14	2.8(1.14)	4.91e-16	1.26e-13
RENAL TUBULAR NECROSIS*	Renal And Urinary Disorders	Renal Tubular Necrosis*	14	4.84(2.87-8.18)	4.84(42.6)	4.83	3.12	4.83(3.12)	2.27	0.61	2.27(0.61)	4.57e-10	1.17e-07
SHOCK HAEMORRHAGIC*	Vascular Disorders	Shock Haemorrhagic*	13	5.62(3.26-9.68)	5.61(49.18)	5.6	3.55	5.6(3.55)	2.49	0.82	2.49(0.82)	2.31e-11	5.95e-09
TORSADE DE POINTES*	Cardiac Disorders	Torsade De Pointes*	13	5.51(3.2-9.5)	5.51(47.89)	5.5	3.49	5.5(3.49)	2.46	0.79	2.46(0.79)	4.25e-11	1.09e-08
HYPERCALCAEMIA*	Metabolism And Nutrition Disorders	Hypercalcaemia*	13	3.53(2.05-6.08)	3.53(23.49)	3.52	2.23	3.52(2.23)	1.82	0.15	1.82(0.15)	4.51e-06	0.0011591
PHOTOPSIA*	Eye Disorders	Photopsia*	12	6.27(3.56-11.05)	6.27(53.02)	6.26	3.89	6.26(3.89)	2.65	0.98	2.65(0.98)	4.5e-12	1.16e-09
URINE OUTPUT DECREASED*	Investigations	Urine Output Decreased*	12	4.44(2.52-7.83)	4.44(31.97)	4.44	2.76	4.44(2.76)	2.15	0.48	2.15(0.48)	8.79e-08	2.26e-05
ASPHYXIA*	Respiratory, Thoracic And Mediastinal Disorders	Asphyxia*	12	4.59(2.61-8.09)	4.59(33.66)	4.59	2.85	4.59(2.85)	2.2	0.53	2.2(0.53)	3.96e-08	1.02e-05
SPRUE-LIKE ENTEROPATHY*	Gastrointestinal Disorders	Sprue-Like Enteropathy*	12	7.45(4.23-13.13)	7.45(66.81)	7.43	4.62	7.43(4.62)	2.89	1.23	2.89(1.23)	7.24e-15	1.86e-12
ATRIOVENTRICULAR BLOCK COMPLETE*	Cardiac Disorders	Atrioventricular Block Complete*	12	6.01(3.41-10.58)	6(49.92)	5.99	3.73	5.99(3.73)	2.58	0.92	2.58(0.92)	1.92e-11	4.92e-09
SINUS NODE DYSFUNCTION*	Cardiac Disorders	Sinus Node Dysfunction*	11	11.97(6.62-21.65)	11.96(110.08)	11.92	7.26	11.92(7.26)	3.58	1.91	3.58(1.91)	2.03e-23	5.22e-21
EXERCISE TOLERANCE DECREASED*	General Disorders And Administration Site Conditions	Exercise Tolerance Decreased*	11	6.49(3.59-11.72)	6.48(50.9)	6.47	3.94	6.47(3.94)	2.69	1.03	2.69(1.03)	1.47e-11	3.77e-09
BLOOD DISORDER*	Blood And Lymphatic System Disorders	Blood Disorder*	11	4.52(2.5-8.17)	4.52(30.09)	4.51	2.75	4.51(2.75)	2.17	0.51	2.17(0.51)	2.4e-07	6.16e-05
AMYLOID ARTHROPATHY*	Musculoskeletal And Connective Tissue Disorders	Amyloid Arthropathy*	11	820.53(420.17-1602.36)	820.04(7018.77)	639.85	365.48	639.85(365.48)	9.32	7.61	9.32(7.61)	0	0
HYPERLACTACIDAEMIA*	Metabolism And Nutrition Disorders	Hyperlactacidaemia*	10	14.18(7.61-26.39)	14.17(121.8)	14.1	8.39	14.1(8.39)	3.82	2.15	3.82(2.15)	1.59e-25	4.07e-23
CEREBRAL HAEMATOMA*	Nervous System Disorders	Cerebral Haematoma*	10	9.9(5.32-18.42)	9.9(79.7)	9.87	5.87	9.87(5.87)	3.3	1.64	3.3(1.64)	3.43e-17	8.82e-15
AUTOIMMUNE HEPATITIS*	Hepatobiliary Disorders	Autoimmune Hepatitis*	10	5.05(2.71-9.38)	5.04(32.36)	5.04	3	5.04(3)	2.33	0.67	2.33(0.67)	9.61e-08	2.47e-05
HYPOVOLAEMIA*	Metabolism And Nutrition Disorders	Hypovolaemia*	10	5.7(3.07-10.61)	5.7(38.7)	5.69	3.39	5.69(3.39)	2.51	0.84	2.51(0.84)	5.11e-09	1.31e-06
DIZZINESS POSTURAL	Nervous System Disorders	Dizziness Postural	10	3.73(2.01-6.94)	3.73(19.97)	3.73	2.22	3.73(2.22)	1.9	0.23	1.9(0.23)	3.13e-05	0.00804032
FAECES SOFT*	Gastrointestinal Disorders	Faeces Soft*	10	5.13(2.76-9.54)	5.13(33.17)	5.12	3.05	5.12(3.05)	2.36	0.69	2.36(0.69)	6.6e-08	1.7e-05
ORAL MUCOSAL BLISTERING*	Gastrointestinal Disorders	Oral Mucosal Blistering*	10	5.17(2.78-9.61)	5.16(33.51)	5.16	3.07	5.16(3.07)	2.37	0.7	2.37(0.7)	5.64e-08	1.45e-05
BLOOD MAGNESIUM DECREASED*	Investigations	Blood Magnesium Decreased*	10	3.92(2.11-7.28)	3.91(21.67)	3.91	2.33	3.91(2.33)	1.97	0.3	1.97(0.3)	1.41e-05	0.00362285
ABORTION INDUCED*	Surgical And Medical Procedures	Abortion Induced*	10	3.41(1.83-6.34)	3.41(16.99)	3.4	2.03	3.4(2.03)	1.77	0.1	1.77(0.1)	0.000128312	0.0329761
ACUTE PULMONARY OEDEMA*	Respiratory, Thoracic And Mediastinal Disorders	Acute Pulmonary Oedema*	10	5.85(3.15-10.88)	5.85(40.11)	5.84	3.47	5.84(3.47)	2.55	0.88	2.55(0.88)	2.66e-09	6.85e-07
HYPOCHLORAEMIA*	Metabolism And Nutrition Disorders	Hypochloraemia*	9	26.63(13.81-51.35)	26.62(219.9)	26.39	15.23	26.39(15.23)	4.72	3.05	4.72(3.05)	2.29e-44	5.87e-42
TACHYARRHYTHMIA*	Cardiac Disorders	Tachyarrhythmia*	9	11.58(6.02-22.29)	11.57(86.59)	11.53	6.67	11.53(6.67)	3.53	1.86	3.53(1.86)	2.34e-18	6.02e-16
VASCULITIC RASH*	Skin And Subcutaneous Tissue Disorders	Vasculitic Rash*	9	37.4(19.37-72.19)	37.38(314.63)	36.92	21.29	36.92(21.29)	5.21	3.54	5.21(3.54)	8.64e-63	2.22e-60
LICHEN PLANUS*	Skin And Subcutaneous Tissue Disorders	Lichen Planus*	9	13.63(7.08-26.25)	13.63(104.83)	13.57	7.84	13.57(7.84)	3.76	2.09	3.76(2.09)	6.3e-22	1.62e-19
ORAL LICHEN PLANUS*	Gastrointestinal Disorders	Oral Lichen Planus*	9	62.93(32.51-121.82)	62.9(536.64)	61.59	35.44	61.59(35.44)	5.94	4.27	5.94(4.27)	6.62e-106	1.7e-103
BLOOD IMMUNOGLOBULIN E INCREASED*	Investigations	Blood Immunoglobulin E Increased*	9	12.66(6.58-24.37)	12.65(96.17)	12.6	7.29	12.6(7.29)	3.66	1.99	3.66(1.99)	3.11e-20	7.99e-18
CONCUSSION*	Injury, Poisoning And Procedural Complications	Concussion*	9	3.91(2.03-7.52)	3.91(19.45)	3.9	2.26	3.9(2.26)	1.97	0.3	1.97(0.3)	4.48e-05	0.0115089
AORTIC STENOSIS*	Vascular Disorders	Aortic Stenosis*	9	8.57(4.45-16.49)	8.57(59.99)	8.55	4.94	8.55(4.94)	3.1	1.43	3.1(1.43)	3.93e-13	1.01e-10
TUNNEL VISION*	Nervous System Disorders	Tunnel Vision*	9	16.16(8.39-31.12)	16.15(127.22)	16.07	9.29	16.07(9.29)	4.01	2.34	4.01(2.34)	2.64e-26	6.8e-24
ACTINIC KERATOSIS*	Skin And Subcutaneous Tissue Disorders	Actinic Keratosis*	9	10.83(5.63-20.84)	10.83(79.97)	10.79	6.24	10.79(6.24)	3.43	1.76	3.43(1.76)	4.65e-17	1.2e-14
DRUG USE DISORDER*	Psychiatric Disorders	Drug Use Disorder*	9	5.51(2.87-10.6)	5.51(33.17)	5.5	3.18	5.5(3.18)	2.46	0.79	2.46(0.79)	7.94e-08	2.04e-05
VASCULAR PURPURA*	Skin And Subcutaneous Tissue Disorders	Vascular Purpura*	9	21.89(11.36-42.18)	21.88(177.98)	21.72	12.55	21.72(12.55)	4.44	2.77	4.44(2.77)	3.33e-36	8.55e-34
ATRIOVENTRICULAR BLOCK*	Cardiac Disorders	Atrioventricular Block*	9	3.88(2.02-7.47)	3.88(19.23)	3.88	2.24	3.88(2.24)	1.96	0.29	1.96(0.29)	8.81e-29	2.26e-26
BRADYARRHYTHMIA*	Cardiac Disorders	Bradyarrhythmia*	8	16.27(8.12-32.61)	16.27(113.98)	16.18	9.05	16.18(9.05)	4.02	2.35	4.02(2.35)	2.17e-23	5.58e-21
RENAL ARTERY STENOSIS*	Renal And Urinary Disorders	Renal Artery Stenosis*	8	17.95(8.96-35.98)	17.95(127.24)	17.84	9.97	17.84(9.97)	4.16	2.49	4.16(2.49)	6.08e-26	1.56e-23
ATRIOVENTRICULAR BLOCK SECOND DEGREE*	Cardiac Disorders	Atrioventricular Block Second Degree*	8	8.61(4.3-17.25)	8.61(53.66)	8.59	4.8	8.59(4.8)	3.1	1.44	3.1(1.44)	9.94e-12	2.55e-09
LARYNGEAL OEDEMA*	Respiratory, Thoracic And Mediastinal Disorders	Laryngeal Oedema*	8	4.33(2.16-8.66)	4.33(20.43)	4.32	2.42	4.32(2.42)	2.11	0.45	2.11(0.45)	3.29e-05	0.00844524
CONJUNCTIVAL HAEMORRHAGE*	Eye Disorders	Conjunctival Haemorrhage*	8	6.72(3.35-13.44)	6.71(38.81)	6.7	3.75	6.7(3.75)	2.74	1.08	2.74(1.08)	7.84e-09	2.02e-06
COLITIS ISCHAEMIC*	Gastrointestinal Disorders	Colitis Ischaemic*	8	4.05(2.03-8.11)	4.05(18.38)	4.05	2.27	4.05(2.27)	2.02	0.35	2.02(0.35)	8.45e-05	0.0217242
RENAL CELL CARCINOMA*	Neoplasms Benign, Malignant And Unspecified (Incl Cysts And Polyps)	Renal Cell Carcinoma*	8	4.6(2.3-9.21)	4.6(22.5)	4.59	2.57	4.59(2.57)	2.2	0.53	2.2(0.53)	1.27e-05	0.00327349
SYNOVIAL CYST*	Musculoskeletal And Connective Tissue Disorders	Synovial Cyst*	8	5.35(2.67-10.71)	5.35(28.23)	5.34	2.99	5.34(2.99)	2.42	0.75	2.42(0.75)	9.35e-07	0.000240422
MYCOBACTERIUM TUBERCULOSIS COMPLEX TEST POSITIVE*	Investigations	Mycobacterium Tuberculosis Complex Test Positive*	8	10.88(5.43-21.78)	10.87(71.46)	10.84	6.06	10.84(6.06)	3.44	1.77	3.44(1.77)	3.5e-15	9.01e-13
OLIGURIA*	Renal And Urinary Disorders	Oliguria*	8	4.22(2.11-8.45)	4.22(19.65)	4.22	2.36	4.22(2.36)	2.08	0.41	2.08(0.41)	4.71e-05	0.0120964
LEFT VENTRICULAR DYSFUNCTION*	Cardiac Disorders	Left Ventricular Dysfunction*	8	4.11(2.05-8.23)	4.11(18.8)	4.11	2.3	4.11(2.3)	2.04	0.37	2.04(0.37)	6.95e-05	0.0178648
MINERAL METABOLISM DISORDER*	Metabolism And Nutrition Disorders	Mineral Metabolism Disorder*	7	147.53(69.03-315.31)	147.48(969.22)	140.41	74.37	140.41(74.37)	7.13	5.45	7.13(5.45)	1.48e-183	3.79e-181
SINUS ARREST*	Cardiac Disorders	Sinus Arrest*	7	15.25(7.26-32.06)	15.24(92.69)	15.17	8.15	15.17(8.15)	3.92	2.26	3.92(2.26)	6.04e-19	1.55e-16
HYPERURICAEMIA*	Metabolism And Nutrition Disorders	Hyperuricaemia*	7	5.69(2.71-11.95)	5.69(27.02)	5.68	3.05	5.68(3.05)	2.51	0.84	2.51(0.84)	2.06e-06	0.000529913
HYPERSENSITIVITY VASCULITIS*	Skin And Subcutaneous Tissue Disorders	Hypersensitivity Vasculitis*	7	8(3.81-16.8)	8(42.74)	7.98	4.29	7.98(4.29)	3	1.33	3(1.33)	1.93e-09	4.96e-07
BLOOD PHOSPHORUS DECREASED*	Investigations	Blood Phosphorus Decreased*	7	6.48(3.09-13.61)	6.48(32.37)	6.47	3.48	6.47(3.48)	2.69	1.03	2.69(1.03)	1.9e-07	4.89e-05
DERMATITIS EXFOLIATIVE GENERALISED*	Skin And Subcutaneous Tissue Disorders	Dermatitis Exfoliative Generalised*	7	8.06(3.84-16.93)	8.06(43.17)	8.04	4.32	8.04(4.32)	3.01	1.34	3.01(1.34)	1.59e-09	4.1e-07
HAEMATOMA MUSCLE*	Musculoskeletal And Connective Tissue Disorders	Haematoma Muscle*	7	23.21(11.03-48.85)	23.21(147.57)	23.03	12.36	23.03(12.36)	4.53	2.86	4.53(2.86)	2.57e-29	6.61e-27
INTRA-ABDOMINAL HAEMATOMA*	Gastrointestinal Disorders	Intra-Abdominal Haematoma*	7	16.08(7.65-33.81)	16.08(98.42)	15.99	8.59	15.99(8.59)	4	2.33	4(2.33)	4.96e-20	1.27e-17
CHOLANGIOCARCINOMA*	Neoplasms Benign, Malignant And Unspecified (Incl Cysts And Polyps)	Cholangiocarcinoma*	7	16.99(8.08-35.73)	16.99(104.72)	16.9	9.07	16.9(9.07)	4.08	2.41	4.08(2.41)	3.19e-21	8.2e-19
SCLERODERMA*	Musculoskeletal And Connective Tissue Disorders	Scleroderma*	7	6.2(2.96-13.03)	6.2(30.49)	6.19	3.33	6.19(3.33)	2.63	0.96	2.63(0.96)	4.39e-07	0.000112923
INTESTINAL ANGIOEDEMA*	Gastrointestinal Disorders	Intestinal Angioedema*	7	42.33(20.07-89.28)	42.31(278.3)	41.72	22.34	41.72(22.34)	5.38	3.71	5.38(3.71)	6.32e-54	1.62e-51
CORONAVIRUS TEST POSITIVE*	Investigations	Coronavirus Test Positive*	7	20.92(9.95-44.01)	20.92(131.8)	20.77	11.15	20.77(11.15)	4.38	2.71	4.38(2.71)	2.43e-26	6.24e-24
DYSLIPIDAEMIA*	Metabolism And Nutrition Disorders	Dyslipidaemia*	7	4.49(2.14-9.43)	4.49(18.96)	4.48	2.41	4.48(2.41)	2.16	0.5	2.16(0.5)	7.69e-05	0.0197556
PRE-ECLAMPSIA*	Pregnancy, Puerperium And Perinatal Conditions	Pre-Eclampsia*	7	4.96(2.36-10.41)	4.96(22.07)	4.95	2.66	4.95(2.66)	2.31	0.64	2.31(0.64)	1.89e-05	0.00485522
PETIT MAL EPILEPSY*	Nervous System Disorders	Petit Mal Epilepsy*	7	4.68(2.23-9.83)	4.68(20.23)	4.67	2.51	4.67(2.51)	2.22	0.56	2.22(0.56)	4.33e-05	0.0111318
RENAL TUBULAR DISORDER*	Renal And Urinary Disorders	Renal Tubular Disorder*	7	7.95(3.79-16.7)	7.95(42.42)	7.93	4.26	7.93(4.26)	2.99	1.32	2.99(1.32)	2.23e-09	5.72e-07
NEPHRITIS ALLERGIC*	Renal And Urinary Disorders	Nephritis Allergic*	6	53.69(23.94-120.41)	53.68(304.54)	52.72	26.82	52.72(26.82)	5.72	4.05	5.72(4.05)	2.11e-57	5.42e-55
SINGLE FUNCTIONAL KIDNEY*	Renal And Urinary Disorders	Single Functional Kidney*	6	28.33(12.68-63.31)	28.32(156.6)	28.06	14.31	28.06(14.31)	4.81	3.14	4.81(3.14)	2.87e-30	7.38e-28
GLOMERULONEPHRITIS MEMBRANOUS*	Renal And Urinary Disorders	Glomerulonephritis Membranous*	6	17.24(7.73-38.48)	17.24(91.23)	17.14	8.76	17.14(8.76)	4.1	2.43	4.1(2.43)	3.14e-18	8.06e-16
PRERENAL FAILURE*	Renal And Urinary Disorders	Prerenal Failure*	6	14.37(6.44-32.06)	14.37(74.27)	14.3	7.31	14.3(7.31)	3.84	2.17	3.84(2.17)	4.3e-15	1.11e-12
RENAL TUBULAR ACIDOSIS*	Renal And Urinary Disorders	Renal Tubular Acidosis*	6	9.82(4.4-21.89)	9.82(47.35)	9.79	5	9.79(5)	3.29	1.62	3.29(1.62)	4.3e-10	1.11e-07
INFECTION IN AN IMMUNOCOMPROMISED HOST*	Infections And Infestations	Infection In An Immunocompromised Host*	6	30.67(13.72-68.56)	30.66(170.35)	30.35	15.48	30.35(15.48)	4.92	3.25	4.92(3.25)	8.55e-33	2.2e-30
ANTIPSYCHOTIC DRUG LEVEL INCREASED*	Investigations	Antipsychotic Drug Level Increased*	6	7.06(3.17-15.72)	7.05(31.1)	7.04	3.6	7.04(3.6)	2.82	1.15	2.82(1.15)	4.78e-07	0.000122757
ACCIDENTAL POISONING*	Injury, Poisoning And Procedural Complications	Accidental Poisoning*	6	21.95(9.83-49.01)	21.94(119.03)	21.79	11.12	21.79(11.12)	4.45	2.78	4.45(2.78)	2.34e-23	6.02e-21
DERMATITIS PSORIASIFORM*	Skin And Subcutaneous Tissue Disorders	Dermatitis Psoriasiform*	6	10.07(4.52-22.46)	10.07(48.86)	10.04	5.13	10.04(5.13)	3.33	1.66	3.33(1.66)	2.25e-10	5.79e-08
PRODUCT COATING ISSUE*	Product Issues	Product Coating Issue*	6	20.7(9.27-46.21)	20.69(111.66)	20.55	10.5	20.55(10.5)	4.36	2.69	4.36(2.69)	5.36e-22	1.38e-19
BRONCHIOLITIS*	Infections And Infestations	Bronchiolitis*	6	5.64(2.53-12.57)	5.64(22.87)	5.63	2.88	5.63(2.88)	2.49	0.83	2.49(0.83)	1.72e-05	0.00443281
PERIORBITAL HAEMATOMA*	Injury, Poisoning And Procedural Complications	Periorbital Haematoma*	6	22.49(10.07-50.22)	22.48(122.2)	22.32	11.39	22.32(11.39)	4.48	2.81	4.48(2.81)	6.11e-24	1.57e-21
MENINGORRHAGIA*	Nervous System Disorders	Meningorrhagia*	6	74.57(33.16-167.71)	74.55(424.49)	72.71	36.9	72.71(36.9)	6.18	4.51	6.18(4.51)	2.33e-79	5.99e-77
PANCREATIC CARCINOMA METASTATIC*	Neoplasms Benign, Malignant And Unspecified (Incl Cysts And Polyps)	Pancreatic Carcinoma Metastatic*	6	6.71(3.01-14.96)	6.71(29.1)	6.7	3.43	6.7(3.43)	2.74	1.08	2.74(1.08)	1.14e-06	0.000292641
MUSCLE RUPTURE*	Injury, Poisoning And Procedural Complications	Muscle Rupture*	6	5.26(2.36-11.72)	5.26(20.66)	5.25	2.69	5.25(2.69)	2.39	0.73	2.39(0.73)	4.55e-05	0.0117048
RASH MORBILLIFORM*	Skin And Subcutaneous Tissue Disorders	Rash Morbilliform*	6	7.44(3.34-16.59)	7.44(33.38)	7.43	3.8	7.43(3.8)	2.89	1.23	2.89(1.23)	1.78e-07	4.58e-05
TONGUE OEDEMA	Gastrointestinal Disorders	Tongue Oedema	6	5.12(2.3-11.4)	5.12(19.83)	5.11	2.61	5.11(2.61)	2.35	0.69	2.35(0.69)	6.55e-05	0.0168385
CHOLANGITIS SCLEROSING*	Hepatobiliary Disorders	Cholangitis Sclerosing*	6	10.37(4.65-23.11)	10.37(50.59)	10.33	5.28	10.33(5.28)	3.37	1.7	3.37(1.7)	1.07e-10	2.75e-08
PERIPHERAL ARTERY THROMBOSIS*	Vascular Disorders	Peripheral Artery Thrombosis*	6	10.23(4.59-22.82)	10.23(49.8)	10.2	5.21	10.2(5.21)	3.35	1.68	3.35(1.68)	1.5e-10	3.87e-08
TONGUE ABSCESS*	Infections And Infestations	Tongue Abscess*	6	295.76(127.69-685.09)	295.67(1599.38)	268.47	132.94	268.47(132.94)	8.07	6.37	8.07(6.37)	5.09e-294	1.31e-291
BLOOD LACTIC ACID*	Investigations	Blood Lactic Acid*	6	172.77(75.81-393.74)	172.72(966.9)	163.09	81.86	163.09(81.86)	7.35	5.66	7.35(5.66)	1.66e-178	4.27e-176
SPINA BIFIDA*	Congenital, Familial And Genetic Disorders	Spina Bifida*	6	8.78(3.94-19.57)	8.78(41.24)	8.76	4.48	8.76(4.48)	3.13	1.46	3.13(1.46)	5.98e-09	1.54e-06
COLD URTICARIA	Skin And Subcutaneous Tissue Disorders	Cold Urticaria	6	107.72(47.68-243.34)	107.68(611.5)	103.87	52.52	103.87(52.52)	6.7	5.02	6.7(5.02)	1.47e-113	3.77e-111
XEROSIS*	General Disorders And Administration Site Conditions	Xerosis*	6	17.47(7.83-38.98)	17.46(92.56)	17.36	8.87	17.36(8.87)	4.12	2.45	4.12(2.45)	1.78e-18	4.59e-16
CEREBRAL HYPOPERFUSION*	Nervous System Disorders	Cerebral Hypoperfusion*	6	50(22.31-112.07)	49.98(283.16)	49.16	25.02	49.16(25.02)	5.62	3.95	5.62(3.95)	1.74e-53	4.48e-51
DIABETIC METABOLIC DECOMPENSATION*	Metabolism And Nutrition Disorders	Diabetic Metabolic Decompensation*	5	12(4.98-28.88)	11.99(50.18)	11.95	5.73	11.95(5.73)	3.58	1.91	3.58(1.91)	2.78e-10	7.13e-08
CARDIOVASCULAR INSUFFICIENCY*	Cardiac Disorders	Cardiovascular Insufficiency*	5	9.67(4.02-23.28)	9.67(38.75)	9.64	4.63	9.64(4.63)	3.27	1.6	3.27(1.6)	3.2e-08	8.21e-06
NEUROGENIC BLADDER*	Renal And Urinary Disorders	Neurogenic Bladder*	5	7.59(3.16-18.27)	7.59(28.54)	7.57	3.63	7.57(3.63)	2.92	1.25	2.92(1.25)	2.28e-06	0.000586015
BLOOD ELECTROLYTES ABNORMAL*	Investigations	Blood Electrolytes Abnormal*	5	13.3(5.53-32.03)	13.3(56.62)	13.24	6.35	13.24(6.35)	3.73	2.06	3.73(2.06)	1.94e-11	4.98e-09
OCULAR HYPERTENSION*	Eye Disorders	Ocular Hypertension*	5	9.47(3.94-22.79)	9.47(37.76)	9.44	4.53	9.44(4.53)	3.24	1.57	3.24(1.57)	4.83e-08	1.24e-05
BRIEF RESOLVED UNEXPLAINED EVENT*	Respiratory, Thoracic And Mediastinal Disorders	Brief Resolved Unexplained Event*	5	29.92(12.4-72.22)	29.91(138.3)	29.62	14.17	29.62(14.17)	4.89	3.22	4.89(3.22)	5.47e-26	1.4e-23
HYPOCHROMIC ANAEMIA	Blood And Lymphatic System Disorders	Hypochromic Anaemia	5	16.69(6.93-40.21)	16.69(73.33)	16.6	7.95	16.6(7.95)	4.05	2.38	4.05(2.38)	1.98e-14	5.08e-12
SERONEGATIVE ARTHRITIS*	Musculoskeletal And Connective Tissue Disorders	Seronegative Arthritis*	5	18.91(7.85-45.56)	18.9(84.24)	18.79	9	18.79(9)	4.23	2.56	4.23(2.56)	2.24e-16	5.75e-14
OPHTHALMOPLEGIA*	Eye Disorders	Ophthalmoplegia*	5	8.33(3.46-20.04)	8.33(32.14)	8.3	3.98	8.3(3.98)	3.05	1.39	3.05(1.39)	5.04e-07	0.000129647
ANTIPHOSPHOLIPID ANTIBODIES POSITIVE*	Investigations	Antiphospholipid Antibodies Positive*	5	27.54(11.41-66.45)	27.53(126.64)	27.28	13.06	27.28(13.06)	4.77	3.1	4.77(3.1)	6.41e-24	1.65e-21
PATERNAL DRUGS AFFECTING FOETUS*	Injury, Poisoning And Procedural Complications	Paternal Drugs Affecting Foetus*	5	39.62(16.39-95.77)	39.61(185.65)	39.09	18.68	39.09(18.68)	5.29	3.62	5.29(3.62)	2.23e-34	5.73e-32
RENAL DYSPLASIA*	Congenital, Familial And Genetic Disorders	Renal Dysplasia*	5	41.31(17.09-99.88)	41.3(193.86)	40.73	19.46	40.73(19.46)	5.35	3.68	5.35(3.68)	7.85e-36	2.02e-33
BICYTOPENIA*	Blood And Lymphatic System Disorders	Bicytopenia*	5	9.73(4.04-23.42)	9.73(39.04)	9.7	4.65	9.7(4.65)	3.28	1.61	3.28(1.61)	2.84e-08	7.29e-06
PROTEIN-LOSING GASTROENTEROPATHY*	Gastrointestinal Disorders	Protein-Losing Gastroenteropathy*	5	36.26(15.01-87.61)	36.25(169.29)	35.82	17.12	35.82(17.12)	5.16	3.49	5.16(3.49)	1.76e-31	4.52e-29
CLONUS*	Nervous System Disorders	Clonus*	5	6.01(2.5-14.45)	6.01(20.83)	6	2.88	6(2.88)	2.58	0.92	2.58(0.92)	5.92e-05	0.0152253
MUSCULAR DYSTROPHY*	Congenital, Familial And Genetic Disorders	Muscular Dystrophy*	5	37.67(15.59-91.03)	37.66(176.16)	37.19	17.78	37.19(17.78)	5.22	3.54	5.22(3.54)	1.07e-32	2.75e-30
TRANSPLANT DYSFUNCTION*	Injury, Poisoning And Procedural Complications	Transplant Dysfunction*	5	8.13(3.38-19.56)	8.13(31.18)	8.11	3.89	8.11(3.89)	3.02	1.35	3.02(1.35)	7.54e-07	0.000193674
SUBACUTE KIDNEY INJURY*	Renal And Urinary Disorders	Subacute Kidney Injury*	4	775.47(257.35-2336.77)	775.31(2442.03)	612.29	243.29	612.29(243.29)	9.26	7.47	9.26(7.47)	0	0
CONDUCTION DISORDER*	Cardiac Disorders	Conduction Disorder*	4	7.81(2.93-20.84)	7.81(23.69)	7.79	3.43	7.79(3.43)	2.96	1.29	2.96(1.29)	3.06e-05	0.00785212
INTESTINAL VILLI ATROPHY*	Gastrointestinal Disorders	Intestinal Villi Atrophy*	4	30.94(11.55-82.87)	30.93(114.63)	30.61	13.42	30.61(13.42)	4.94	3.26	4.94(3.26)	1.13e-20	2.91e-18
CARDIOACTIVE DRUG LEVEL INCREASED*	Investigations	Cardioactive Drug Level Increased*	4	9.21(3.45-24.58)	9.21(29.17)	9.18	4.04	9.18(4.04)	3.2	1.53	3.2(1.53)	3.42e-06	0.000879743
BOWEN'S DISEASE*	Neoplasms Benign, Malignant And Unspecified (Incl Cysts And Polyps)	Bowen'S Disease*	4	10.81(4.05-28.86)	10.81(35.47)	10.77	4.74	10.77(4.74)	3.43	1.76	3.43(1.76)	2.82e-07	7.25e-05
INSULINOMA*	Neoplasms Benign, Malignant And Unspecified (Incl Cysts And Polyps)	Insulinoma*	4	76.53(28.35-206.55)	76.51(290.45)	74.57	32.49	74.57(32.49)	6.22	4.54	6.22(4.54)	4.23e-50	1.09e-47
OROPHARYNGEAL SWELLING	Respiratory, Thoracic And Mediastinal Disorders	Oropharyngeal Swelling	4	12.36(4.63-33.01)	12.36(41.58)	12.31	5.41	12.31(5.41)	3.62	1.95	3.62(1.95)	2.53e-08	6.5e-06
RECALLED PRODUCT*	Product Issues	Recalled Product*	4	7.35(2.76-19.62)	7.35(21.89)	7.34	3.23	7.34(3.23)	2.87	1.21	2.87(1.21)	6.28e-05	0.016148
SUPERFICIAL SPREADING MELANOMA STAGE I*	Neoplasms Benign, Malignant And Unspecified (Incl Cysts And Polyps)	Superficial Spreading Melanoma Stage I*	4	375.23(132.44-1063.1)	375.15(1322.02)	332.39	139.06	332.39(139.06)	8.38	6.64	8.38(6.64)	6.28e-222	1.61e-219
GENITAL RASH*	Reproductive System And Breast Disorders	Genital Rash*	4	9.28(3.48-24.78)	9.28(29.46)	9.26	4.07	9.26(4.07)	3.21	1.54	3.21(1.54)	3.05e-06	0.000784276
PENILE EXFOLIATION*	Reproductive System And Breast Disorders	Penile Exfoliation*	4	197.15(71.61-542.81)	197.11(730.92)	184.66	79.13	184.66(79.13)	7.53	5.82	7.53(5.82)	1.58e-123	4.07e-121
PULMONARY FUNCTION TEST ABNORMAL*	Investigations	Pulmonary Function Test Abnormal*	4	8.31(3.11-22.17)	8.31(25.64)	8.29	3.64	8.29(3.64)	3.05	1.38	3.05(1.38)	1.4e-05	0.00360443
AMPUTATION STUMP PAIN*	Nervous System Disorders	Amputation Stump Pain*	4	166.17(60.66-455.2)	166.14(621.08)	157.21	67.65	157.21(67.65)	7.3	5.6	7.3(5.6)	3.12e-105	8.02e-103
VESTIBULAR NEURONITIS*	Infections And Infestations	Vestibular Neuronitis*	4	24.64(9.21-65.94)	24.64(89.96)	24.44	10.73	24.44(10.73)	4.61	2.94	4.61(2.94)	1.61e-16	4.13e-14
CAROTID ARTERIOSCLEROSIS*	Nervous System Disorders	Carotid Arteriosclerosis*	4	11.81(4.42-31.53)	11.81(39.41)	11.76	5.17	11.76(5.17)	3.56	1.89	3.56(1.89)	5.96e-08	1.53e-05
LUNG DIFFUSION TEST DECREASED*	Investigations	Lung Diffusion Test Decreased*	4	24.54(9.17-65.66)	24.54(89.55)	24.34	10.68	24.34(10.68)	4.61	2.93	4.61(2.93)	1.88e-16	4.83e-14
ALLERGY TEST POSITIVE	Investigations	Allergy Test Positive	4	37.64(14.04-100.95)	37.64(140.83)	37.17	16.28	37.17(16.28)	5.22	3.54	5.22(3.54)	4.51e-25	1.16e-22
ALLERGY TO ANIMAL	Immune System Disorders	Allergy To Animal	4	13.86(5.19-37.03)	13.86(47.51)	13.8	6.07	13.8(6.07)	3.79	2.12	3.79(2.12)	2.47e-09	6.34e-07
COCKROACH ALLERGY	Immune System Disorders	Cockroach Allergy	4	323.11(115-907.89)	323.04(1155.77)	290.84	122.53	290.84(122.53)	8.18	6.46	8.18(6.46)	2.93e-194	7.52e-192
MITE ALLERGY	Immune System Disorders	Mite Allergy	4	19.99(7.48-53.44)	19.98(71.64)	19.85	8.72	19.85(8.72)	4.31	2.64	4.31(2.64)	1.99e-13	5.1e-11
FOREARM FRACTURE*	Injury, Poisoning And Procedural Complications	Forearm Fracture*	4	19.82(7.41-52.98)	19.81(70.97)	19.68	8.64	19.68(8.64)	4.3	2.63	4.3(2.63)	2.58e-13	6.62e-11
PEPTIC ULCER HAEMORRHAGE*	Gastrointestinal Disorders	Peptic Ulcer Haemorrhage*	4	18.94(7.09-50.64)	18.94(67.53)	18.82	8.27	18.82(8.27)	4.23	2.56	4.23(2.56)	9.81e-13	2.52e-10
CHOROIDAL DETACHMENT*	Eye Disorders	Choroidal Detachment*	4	24.59(9.19-65.8)	24.59(89.75)	24.39	10.7	24.39(10.7)	4.61	2.94	4.61(2.94)	1.74e-16	4.47e-14
ENCEPHALOCELE*	Congenital, Familial And Genetic Disorders	Encephalocele*	4	54.1(20.12-145.48)	54.09(204.63)	53.12	23.22	53.12(23.22)	5.73	4.05	5.73(4.05)	9.3e-36	2.39e-33
ATRIAL STANDSTILL*	Cardiac Disorders	Atrial Standstill*	3	4361.81(728.77-26106.2)	4361.1(5230.92)	1745.04	390.48	1745.04(390.48)	10.77	8.73	10.77(8.73)	0	0
LEFT VENTRICULAR DILATATION*	Cardiac Disorders	Left Ventricular Dilatation*	3	20.67(6.64-64.36)	20.67(55.76)	20.53	7.94	20.53(7.94)	4.36	2.69	4.36(2.69)	7.33e-10	1.88e-07
ELECTROCARDIOGRAM T WAVE PEAKED*	Investigations	Electrocardiogram T Wave Peaked*	3	26.04(8.36-81.16)	26.04(71.58)	25.81	9.97	25.81(9.97)	4.69	3.02	4.69(3.02)	2.68e-12	6.88e-10
BLOOD PRODUCT TRANSFUSION DEPENDENT*	Social Circumstances	Blood Product Transfusion Dependent*	3	21.7(6.97-67.58)	21.7(58.79)	21.54	8.33	21.54(8.33)	4.43	2.76	4.43(2.76)	2.49e-10	6.41e-08
HYPOPERFUSION*	Vascular Disorders	Hypoperfusion*	3	9.96(3.21-30.94)	9.96(24.09)	9.93	3.84	9.93(3.84)	3.31	1.64	3.31(1.64)	6.38e-05	0.0163848
CREATININE RENAL CLEARANCE INCREASED*	Investigations	Creatinine Renal Clearance Increased*	3	13.3(4.28-41.34)	13.3(33.96)	13.24	5.13	13.24(5.13)	3.73	2.06	3.73(2.06)	1.78e-06	0.000457648
HYPOPARATHYROIDISM*	Endocrine Disorders	Hypoparathyroidism*	3	13.22(4.25-41.09)	13.22(33.72)	13.16	5.09	13.16(5.09)	3.72	2.05	3.72(2.05)	1.94e-06	0.000498705
PERITONEAL DISORDER*	Gastrointestinal Disorders	Peritoneal Disorder*	3	14.91(4.79-46.38)	14.91(38.73)	14.84	5.74	14.84(5.74)	3.89	2.22	3.89(2.22)	3.2e-07	8.22e-05
GENITAL BURNING SENSATION*	Reproductive System And Breast Disorders	Genital Burning Sensation*	3	11.84(3.81-36.79)	11.83(29.64)	11.79	4.57	11.79(4.57)	3.56	1.89	3.56(1.89)	8.48e-06	0.00218022
GENITAL ERYTHEMA*	Reproductive System And Breast Disorders	Genital Erythema*	3	23.02(7.39-71.69)	23.01(62.68)	22.84	8.83	22.84(8.83)	4.51	2.84	4.51(2.84)	6.28e-11	1.61e-08
TESTIS DISCOMFORT*	Reproductive System And Breast Disorders	Testis Discomfort*	3	102.63(32.45-324.61)	102.61(291.58)	99.15	37.83	99.15(37.83)	6.63	4.94	6.63(4.94)	9.06e-46	2.33e-43
GASTROINTESTINAL TRACT MUCOSAL PIGMENTATION*	Gastrointestinal Disorders	Gastrointestinal Tract Mucosal Pigmentation*	3	22.6(7.26-70.39)	22.6(61.44)	22.43	8.67	22.43(8.67)	4.49	2.81	4.49(2.81)	9.72e-11	2.5e-08
FAILURE TO SUSPEND MEDICATION*	Injury, Poisoning And Procedural Complications	Failure To Suspend Medication*	3	51.62(16.48-161.67)	51.61(146.29)	50.73	19.51	50.73(19.51)	5.66	3.98	5.66(3.98)	1.03e-23	2.65e-21
MUSCULOSKELETAL TOXICITY*	Musculoskeletal And Connective Tissue Disorders	Musculoskeletal Toxicity*	3	65.59(20.89-205.99)	65.58(186.58)	64.16	24.63	64.16(24.63)	6	4.32	6(4.32)	7.69e-30	1.98e-27
MYCOBACTERIUM TEST POSITIVE*	Investigations	Mycobacterium Test Positive*	3	40.02(12.8-125.05)	40.01(112.56)	39.48	15.22	39.48(15.22)	5.3	3.63	5.3(3.63)	1.43e-18	3.67e-16
MEAN PLATELET VOLUME INCREASED*	Investigations	Mean Platelet Volume Increased*	3	17(5.47-52.91)	17(44.92)	16.91	6.54	16.91(6.54)	4.08	2.41	4.08(2.41)	3.49e-08	8.96e-06
EJECTION FRACTION*	Investigations	Ejection Fraction*	3	15.41(4.96-47.94)	15.41(40.21)	15.33	5.93	15.33(5.93)	3.94	2.27	3.94(2.27)	1.88e-07	4.83e-05
LICHEN PLANOPILARIS*	Skin And Subcutaneous Tissue Disorders	Lichen Planopilaris*	3	143.01(44.87-455.82)	142.99(403.15)	136.33	51.68	136.33(51.68)	7.09	5.39	7.09(5.39)	1.16e-62	2.97e-60
GAIT SPASTIC*	Nervous System Disorders	Gait Spastic*	3	24.92(8-77.66)	24.92(68.3)	24.72	9.55	24.72(9.55)	4.63	2.95	4.63(2.95)	8.56e-12	2.2e-09
DYSMETRIA*	Nervous System Disorders	Dysmetria*	3	17.41(5.6-54.18)	17.41(46.13)	17.31	6.7	17.31(6.7)	4.11	2.44	4.11(2.44)	2.27e-08	5.83e-06
OBSTRUCTIVE SLEEP APNOEA SYNDROME*	Respiratory, Thoracic And Mediastinal Disorders	Obstructive Sleep Apnoea Syndrome*	3	9.48(3.05-29.46)	9.48(22.68)	9.45	3.66	9.45(3.66)	3.24	1.57	3.24(1.57)	0.000106563	0.0273867
PEPTIC ULCER PERFORATION*	Gastrointestinal Disorders	Peptic Ulcer Perforation*	3	39.3(12.58-122.78)	39.29(110.45)	38.78	14.95	38.78(14.95)	5.28	3.6	5.28(3.6)	3e-18	7.7e-16
